# Supplementary material
Source: PubMed Central journal article supplement (PMC1088368)
Supplement: pnas_102_18_6356__1.pdf [file pnas_102_18_6356__1.pdf]

**Table 1. The cell lines tested for the TNF-dependent secretion of KRS**

| <b>KRS</b>              | <b>Secretion</b> | <b>No secretion</b> |
|-------------------------|------------------|---------------------|
| <b>Normal cell line</b> |                  | <b>HEK293</b>       |
|                         |                  | <b>CV-1</b>         |
|                         |                  | <b>Cos-7</b>        |
|                         |                  | <b>Cos-1</b>        |
|                         |                  | <b>RAW264.7</b>     |
| <b>Cancer cell line</b> | <b>SK-N-SH</b>   | <b>SW480</b>        |
|                         | <b>HCT116</b>    | <b>A549</b>         |
|                         | <b>DU145</b>     | <b>HeLa</b>         |
|                         | <b>MCF-7</b>     | <b>THP-1</b>        |

The cells were treated with TNF- $\alpha$  and TGF- $\beta$ , and KRS secretion was determined as described in Methods. KRS, lysyl-tRNA synthetase; SK-N-SH, human neuroblastoma; HCT116, human colon carcinoma; DU145, human prostate carcinoma; MCF-7, human breast cancer; HEK293, human transformed primary embryonic kidney; CV-1, monkey kidney normal cell; Cos-7, monkey kidney sv40 transformed cell; Cos-1, monkey kidney sv40 transformed cell; RAW 264.7, mouse transformed macrophage; CHO, chinese hamster ovary normal cell; SW480, human colon adenocarcinoma; A549, human lung carcinoma; HeLa, human uterine adenocarcinoma; THP-1, human monocyte leukemia.
